# Supplementary material for: Metabolomics for predicting fetal growth restriction: protocol for a systematic review and meta-analysis
Source: PubMed Central journal article supplement (PMC6286473; doi:10.1136/bmjopen-2018-022743), 2018-12-06
Supplement: bmjopen-2018-022743supp001.pdf [file bmjopen-2018-022743supp001.pdf]

## Metabolomics for predicting fetal growth restriction: protocol for a systematic review and meta-analysis

|    |                                                                        |
|----|------------------------------------------------------------------------|
| #  | Date                                                                   |
| 1  | fetal growth retardation                                               |
| 2  | fetal growth restriction                                               |
| 3  | intrauterine growth restriction                                        |
| 4  | intrauterine growth retardation                                        |
| 5  | small for gestational age                                              |
| 6  | #1 OR #2 OR #3 OR #4 OR #5                                             |
| 7  | metabolomic*                                                           |
| 8  | metabonomic*                                                           |
| 9  | metabolit*                                                             |
| 10 | H NMR                                                                  |
| 11 | proton NMR                                                             |
| 12 | proton nuclear magnetic resonance                                      |
| 13 | liquid chromatogra*                                                    |
| 14 | gas chromatogra*                                                       |
| 15 | UPLC                                                                   |
| 16 | ultra-performance liquid chromatograph*                                |
| 17 | ultra performance liquid chromatograph*                                |
| 18 | #7 OR #8 OR #9 OR #10 OR #11 OR #12 OR #13 OR #14 OR #15 OR #16 OR #17 |
| 19 | pregnan*                                                               |
| 20 | antenat*                                                               |
| 21 | ante nat*                                                              |
| 22 | prenat*                                                                |
| 23 | pre nat*                                                               |
| 24 | #19 OR #20 OR #21 or #22 OR #23                                        |
| 25 | screen*                                                                |
| 26 | predict*                                                               |
| 27 | metabolic profil*                                                      |
| 28 | #25 OR #26 OR #27                                                      |
| 29 | #6 AND #18 AND #24 AND 28                                              |
